# Supplementary material for: SIFamide Influences Feeding in the Chagas Disease Vector, Rhodnius prolixus
Source: PubMed Central journal article supplement (PMC7047498; doi:10.3389/fnins.2020.00134), 2020-02-21
Supplement: Image_1.pdf [file Image_1.pdf]

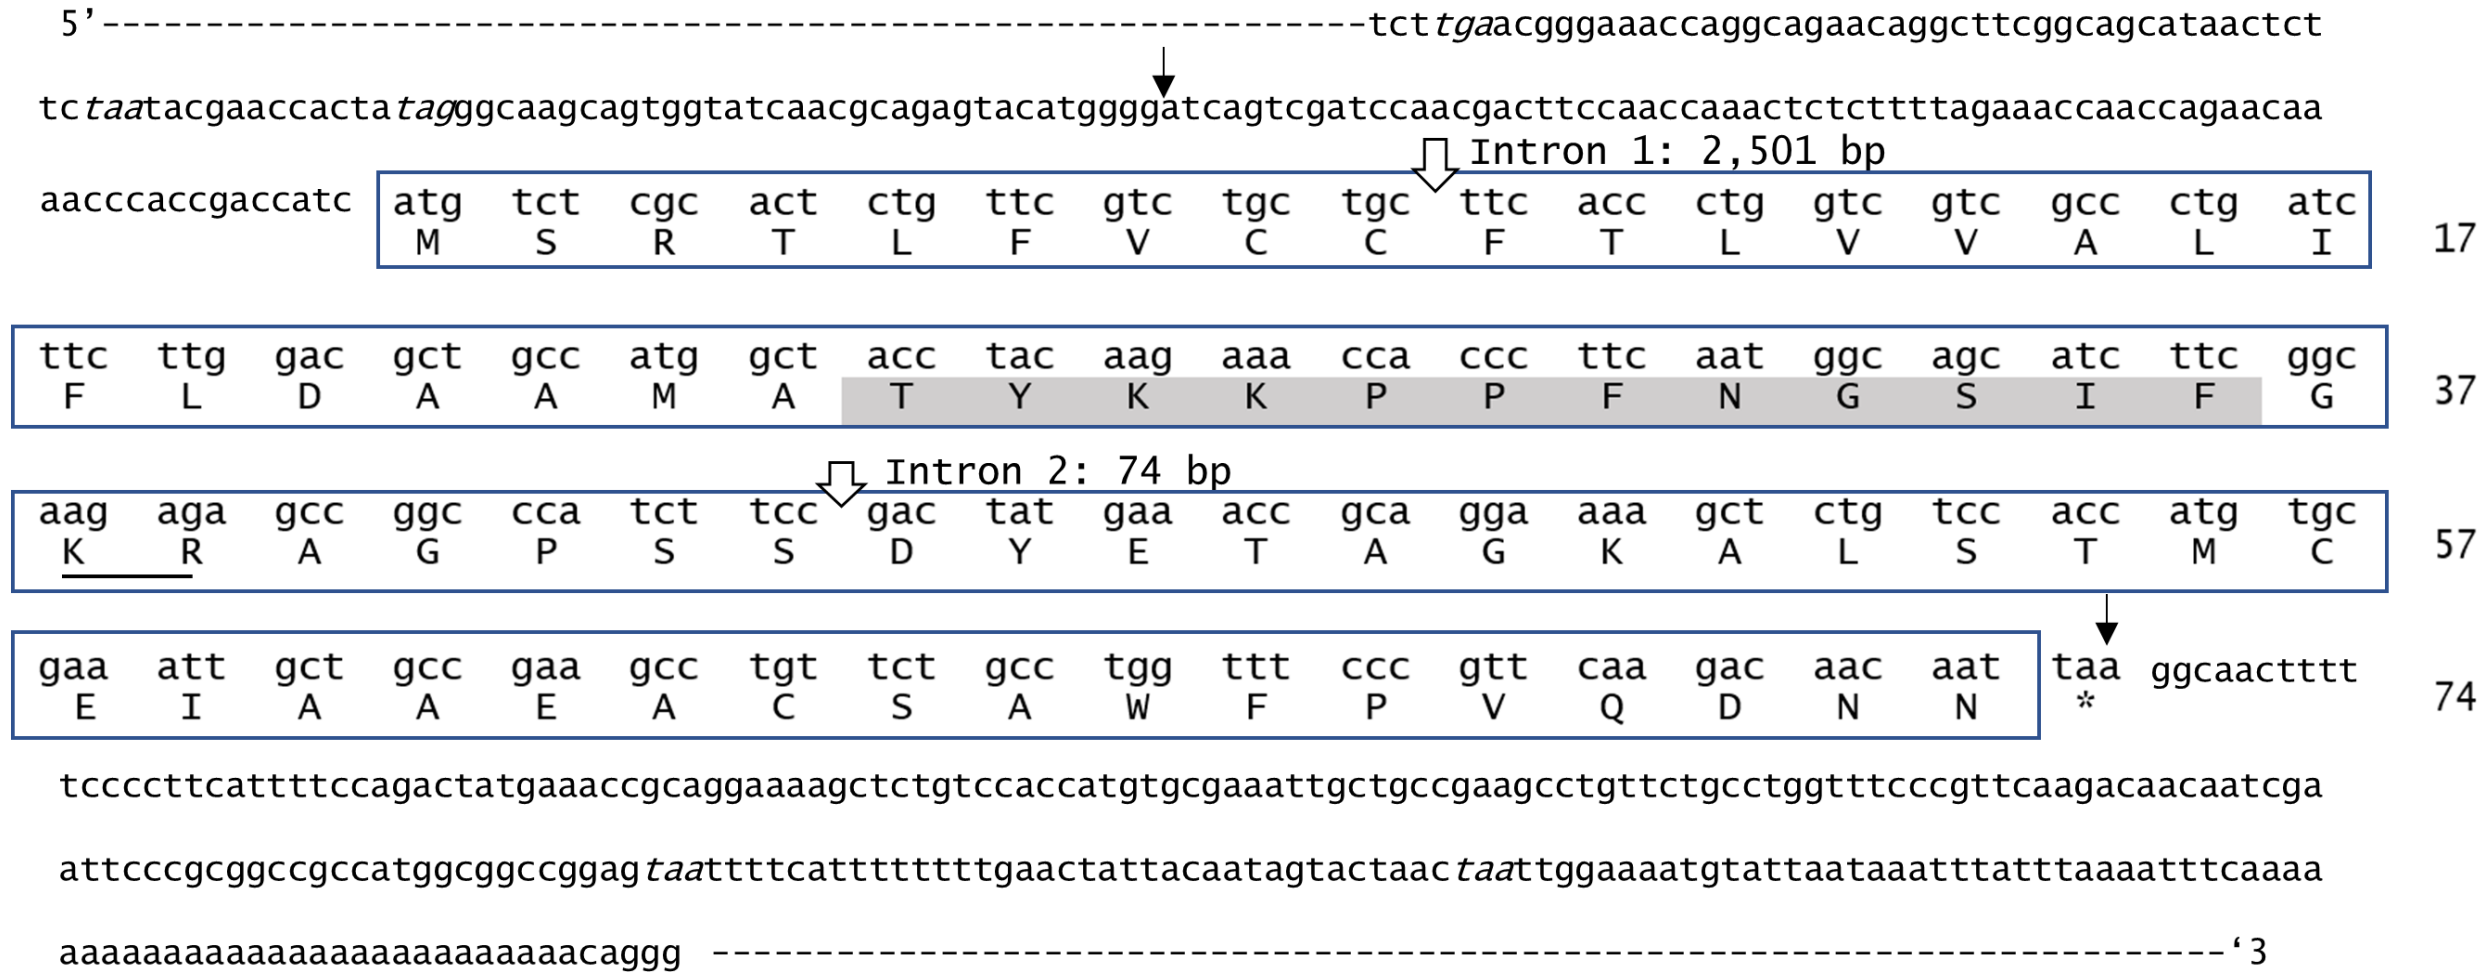

**Supplementary Figure 1.** Complete nucleotide sequence of cDNA encoding SIFamide in *R. prolixus*. Nucleotide and amino acid sequences of the coding region start at the nucleotide sequence ATG and asterisk indicates stop codon terminating the ORF (indicated by blue frame). The grey shaded region indicates the mature Rhopr-SIFa amino acid sequence. The length of the sequence previously reported (Ons et al., 2011; GenBank Accession No. ACT35307.1) is indicated by solid arrows. A predicted dibasic proteolytic cleavage site KR is underlined. Open arrows indicate position and length of introns. Stop codons in 3' and 5' UTR are italicized.
