# Supplementary material for: SIFamide Influences Feeding in the Chagas Disease Vector, Rhodnius prolixus
Source: PubMed Central journal article supplement (PMC7047498; doi:10.3389/fnins.2020.00134), 2020-02-21
Supplement: Image_4.pdf [file Image_4.pdf]

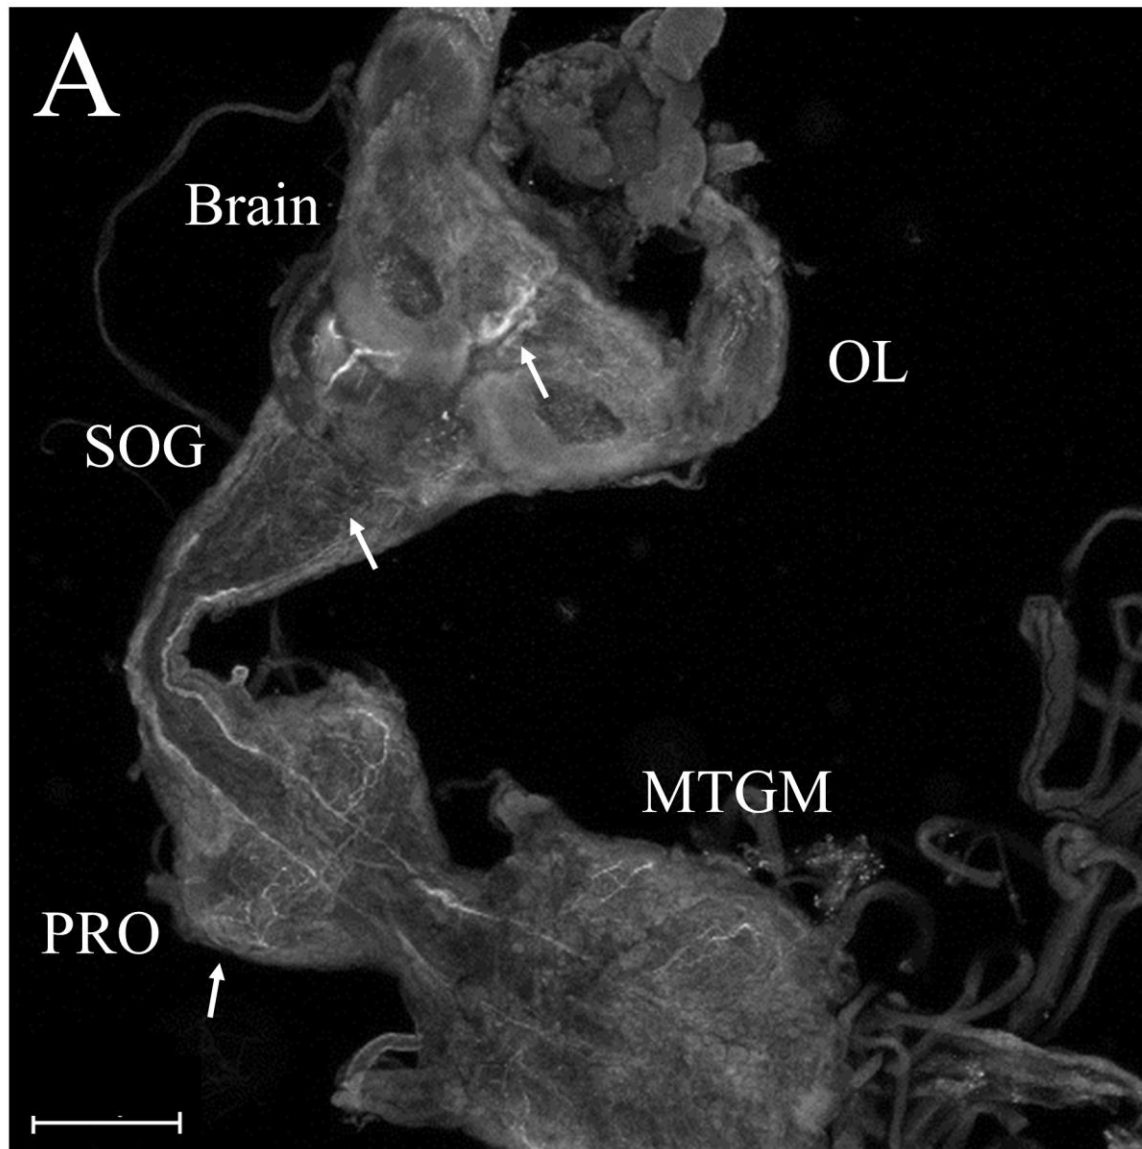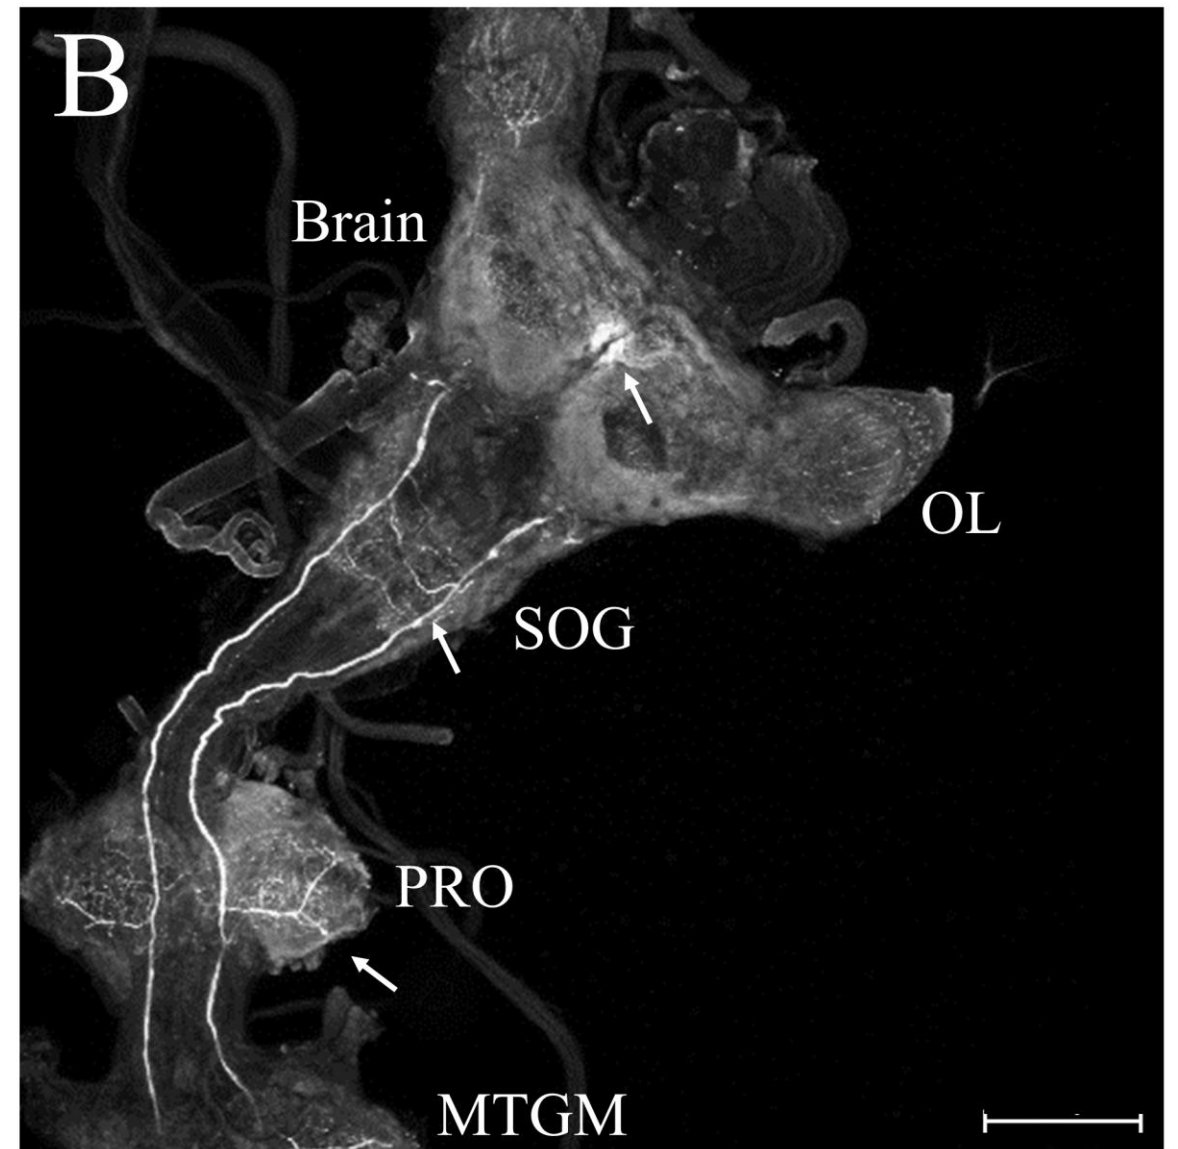

**Supplementary Figure 4:** Verification of dsRNA knockdown by immunohistochemistry. Central nervous systems from insects injected with dsSIFa or dsARG were examined Day 2 post-injection. (A) dsSIFa-treated insects had reduced staining intensity in cell bodies and neuropile processes (arrows). (B) dsARG-injected insects display bright SIFa-like immunoreactive staining in cell bodies and neuropile processes (arrows). Brain; SOG, suboesophageal ganglionic mass; PRO, prothoracic ganglion; MTGM, mesothoracic ganglionic mass; OL, optic lobe. Scale bars: 100  $\mu$ m
