# Supplementary material for: SIFamide Influences Feeding in the Chagas Disease Vector, Rhodnius prolixus
Source: PubMed Central journal article supplement (PMC7047498; doi:10.3389/fnins.2020.00134), 2020-02-21
Supplement: Table_2.pdf [file Table_2.pdf]

**Supplemental Table 2:** Primers used to construct dsRNA for A: Rhopr-SIFa expression knockdown. B: dsARG for control injections.

| <b>A: Primers used to generate dsSIFa (5' – 3')</b> |                                                          |
|-----------------------------------------------------|----------------------------------------------------------|
| SIFa-Fw                                             | CATGTCTCGCACTCTGTTTCG                                    |
| SIFa Rv                                             | GTTGTCTTGAACGGGAAACC                                     |
| SIFa Fw T7                                          | <b>TAATACGACTCACTATAGGGAGAC</b> ATGTCTCGCACTCTGTTTCG     |
| SIFa Rv T7                                          | <b>TAATACGACTCACTATAGGGAGAG</b> TGTCTTGAACGGGAAACC       |
| <b>B: Primers used to generate dsARG (5' – 3')</b>  |                                                          |
| dsRNA-ARG-FOR1                                      | ATGAGTATTCAACATTTCCGTGTC                                 |
| dsRNA-ARG-REV2                                      | AATAGTTTGC GCAACGTTG                                     |
| dsRNA-ARG-FOR1 T7                                   | <b>TAATACGACTCACTATAGGGAGA</b> AATGAGTATTCAACATTTCCGTGTC |
| dsRNA-ARG-REV2 T7                                   | <b>TAATACGACTCACTATAGGGAGA</b> AATAGTTTGC GCAACGTTG      |

\* **TAATACGACTCACTATAGGGAGA** = T7 RNA polymerase promoter region
